# Supplementary material
Source: Springer Nature journal article supplement (https://www.springermedizin.de/resource/supplementary/12885_2011_3129_MOESM1_ESM.pdf/9462662)

## Eligibility Criteria

Patients must:

1. Be 40 to 79 years age, with a definitive histological diagnosis of PCa by needle biopsy.
2. Have high risk PCa where at least one of the following three factors is satisfied:
  - 1) initial PSA > 20 ng/mL, 2) Clinical stage of T2c or T3a, 3) Gleason score 8-10.
3. Be previously untreated for prostate cancer.
4. Demonstrate appropriate bone marrow, hepatic and renal function in laboratory tests within two weeks prior to registration.
  - a) WBC  $\geq 3,000 /\mu\text{L}$
  - b) Hemoglobin level  $\geq 10.0 \text{ g/dL}$
  - c) Platelet count  $\geq 10.0 \times 10^4 /\mu\text{L}$
  - d) Serum creatine level  $\leq 2.0 \text{ mg/dL}$
  - e) ALT and AST levels  $\leq 100 \text{ IU/L}$
5. Agree in writing to participate in this clinical study after receiving adequate explanation.

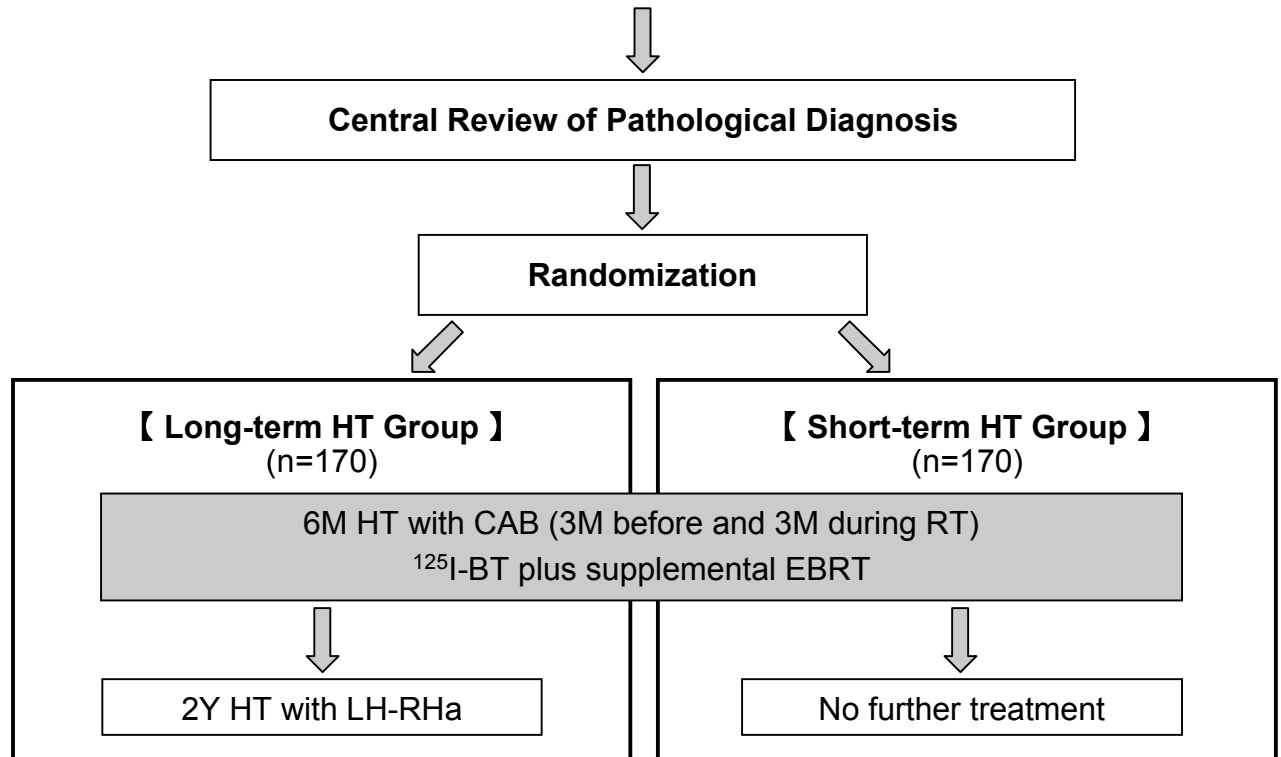

Supplement: MOESM1 [file 9462662]
